# Supplementary material for: The Function of Mitochondrial Calcium Uniporter at the Whole-Cell and Single Mitochondrion Levels in WT, MICU1 KO, and MICU2 KO Cells
Source: Preprints.org preprint supplement (doi:10.20944/preprints202005.0257.v1), 2020-05-15
Supplement: Supplementary file 1 [file supplementary]

## Supplementary Information Text:

### The Function of Mitochondrial Calcium Uniporter at the Whole-Cell and Single Mitochondrion Levels in WT, MICU1 KO, and MICU2 KO Cells

Syed Islamuddin Shah and Ghanim Ullah

#### Bioenergetics model

To investigate how  $\text{Ca}^{2+}$  uptake affects mitochondrial bioenergetics in WT, MICU1 KO, and MICU2 KO cells, we adopt the equations used by Wacquier et al. [1]. The mitochondrial NADH ( $[\text{NADH}]_M$ ), ADP ( $[\text{ADP}]_M$ ), cytosolic ADP ( $[\text{ADP}]_C$ ) concentrations, and mitochondrial membrane potential ( $\Delta\psi$ ) are modeled by four rate equations and three conservation equations. Most of these equations were adopted or modified from Refs. [2-5]. In the following, we briefly describe these equations and refer the interested reader to Ref. [1] for more details. The values and meaning of various parameters used are given in Table S1.

#### Evolution equations

$[\text{NADH}]_M$ ,  $[\text{ADP}]_M$ ,  $[\text{ADP}]_C$ , and  $\Delta\psi$  are given by the following rate equations.

$$\frac{d[\text{NADH}]_M}{dt} = V_{PDH} - V_O + V_{AGC}, \quad (\text{S1})$$

$$\frac{d[\text{ADP}]_M}{dt} = V_{ANT} - V_{FIFO}, \quad (\text{S2})$$

$$\frac{d[\text{ADP}]_C}{dt} = V_{HYD} - \delta V_{ANT}, \quad (\text{S3})$$

$$\frac{d\Delta\psi}{dt} = \frac{(a_1 V_O - a_2 V_{FIFO} - V_{ANT} - V_{H,leak} - V_{NaCa} - 2V_{MCU} - J_{AGC})}{C_{mito}}. \quad (\text{S4})$$

Where  $\delta$ ,  $a_1$ ,  $a_2$ , and  $C_{mito}$  is mitochondrial to cytosolic volume ratio, scaling factor between NADH consumption and change in membrane potential, scaling factor between ATP production by ATP synthesis by  $\text{F}_1\text{F}_0$ -ATPase and change in membrane potential, and mitochondrial inner membrane capacitance respectively. Various fluxes used in Eqs. S1-S4 are given below.

#### Conservation equations

Conservation of total  $[\text{NADH}]_M$ , di- and tri-phosphorylated adenine nucleotides in mitochondria, and of di- and tri-phosphorylated adenine nucleotides in the cytosol is given by the following equations.

$$[\text{NADH}]_M + [\text{NAD}^+]_M = [\text{NAD}]_M^{\text{TOT}}, \quad (\text{S5})$$

$$[\text{ADP}]_M + [\text{ATP}]_M = [\text{A}]_M^{\text{TOT}}, \quad (\text{S6})$$

$$[\text{ADP}]_C + [\text{ATP}]_C = [\text{A}]_C^{\text{TOT}}. \quad (\text{S7})$$

Kinetic expressions for various fluxes

Adapted from Magnus and Keizer [3], Eq. S8 accounts for the effects of Pyruvate dehydrogenase (PDH)-catalyzed reaction, glycolytic pathway ( $k_{GLY}$ ), and the Krebs cycle (reduction of  $[NAD^+]_M$  into NADH) [6].

$$V_{PDH} = k_{GLY} \frac{1}{q_1 + \frac{[NADH]_M}{[NAD^+]_M}} \frac{[Ca^{2+}]_M}{q_2 + [Ca^{2+}]_M}. \quad (S8)$$

Another important pathway effected by mitochondrial  $Ca^{2+}$  influx is the aspartate-glutamate carrier (AGC) - a part of the MAS NADH shuttle system, and is given as

$$V_{AGC} = V_{AGC,max} \frac{[Ca^{2+}]_C}{K_{AGC} + [Ca^{2+}]_C} \frac{q_2}{q_2 + [Ca^{2+}]_M} e^{p_4 \Delta\Psi}. \quad (S9)$$

The rate of  $[NADH]_M$  oxidation in the electron transport chain (ETC) and the coupled extrusion of protons from mitochondria are combined into one equation, i.e.

$$V_O = k_o \frac{[NADH]_M}{q_3 + [NADH]_M} \left( 1 + e^{\frac{\Delta\Psi - q_4}{q_5}} \right)^{-1}. \quad (S10)$$

Where the exponential factor contains the dependency on both  $\Delta\Psi$  and the proton (extrusion from mitochondria through electron transport cycle) gradient.

Flux due to adenine nucleotide translocator (also called ADP/ATP translocase or mitochondrial ADP/ATP carrier) exchanges free ATP with free ADP across the inner mitochondrial membrane and is given as

$$V_{ANT} = V_{ANT,max} \frac{1 - \frac{\alpha_C [ATP]_C [ADP]_M}{\alpha_M [ADP]_C [ATP]_M} e^{-\frac{F\Delta\Psi}{RT}}}{\left( 1 + \alpha_C \frac{[ATP]_C}{[ADP]_M} e^{-0.5 \frac{F\Delta\Psi}{RT}} \right) \left( 1 + \frac{[ADP]_M}{\alpha_M [ATP]_M} \right)}. \quad (S11)$$

Here  $[ATP]_C$  -  $[ATP]_M$ ,  $[ATP]_C$  -  $[ADP]_M$ ,  $[ADP]_C$  -  $[ATP]_M$ , and  $[ADP]_C$  -  $[ADP]_M$  represent 4 combinations of ligands and  $\alpha$ s stand for the fact that only a fraction of nucleotides has access to the transporter. The membrane potential dependence of this flux is due to negatively charged ADP and ATP (3- and 4-, respectively).

The rate of ATP synthesis by F<sub>1</sub>F<sub>0</sub>-ATPase is given as

$$V_{FIFO} = V_{FIFO,max} \left( \frac{q_6}{q_6 + [ATP]_M} \right) \left( 1 + e^{\frac{q_7 - \Delta\Psi}{q_8}} \right)^{-1}. \quad (S12)$$

The rate of ATP consumption (ATP hydrolysis) by ATP-consuming processes in the cytoplasm is also incorporated in the model.

$$V_{HYD} = K_{HYD} \frac{[ATP]_C}{[ATP]_C + K_h}. \quad (S13)$$

Finally, the Ohmic mitochondrial proton leak is given as

$$V_{H,leak} = q_9 \Delta\Psi + q_{10}. \quad (S14)$$

The values and meaning of various parameters used are given in Table S1.

### Extracting single channel gating parameters from dwell-time distributions

For demonstration, we used the double-exponential behavior of open dwell-time histogram observed in [7]. Specifically, in the experiments in [7], MCU and the regulatory proteins were inserted into planar bilayer and electrophysiological recording of single channel activity was carried out. In one of these experiments (Figure S3B in [7]), the open dwell-time distribution could be fitted with double exponential with  $\tau_1 = 12.06$  ms and  $\tau_2 = 161.92$  ms. We used these time constants to generate experimental dwell-time distribution (green bars in Figure 6A, main text).

To fit the model to open dwell-time distribution, we follow the formalism developed in [8, 9]. We refer the interested reader to these papers for full details. Briefly, the mean transition time from state A to B can be obtained by multiplying the occupancy of state A with the inverse of probability flux between the two states. For example, if a channel in state A has  $m$  and  $n$  number of ligand ( $L1$  and  $L2$  respectively) molecules bound. The mean transition time from state A to state B where the channel has  $m+2$  and  $n$  molecules of  $L1$  and  $L2$  bound respectively, is given as

$$T_{A \rightarrow B} = K_A L_1^m L_2^n \times \left[ \frac{1}{j_{mn \rightarrow m+1n} L_1^{m+1} L_2^n} + \frac{1}{j_{m+1n \rightarrow m+2n} L_1^{m+2} L_2^n} \right].$$

Similarly, the mean transition time from state B to state A is given as

$$T_{B \rightarrow A} = K_B L_1^{m+2} L_2^n \times \left[ \frac{1}{j_{mn \rightarrow m+1n} L_1^{m+1} L_2^n} + \frac{1}{j_{m+1n \rightarrow m+2n} L_1^{m+2} L_2^n} \right].$$

Where  $K_A L_1^m L_2^n$  and  $K_B L_1^{m+2} L_2^n$  are the occupancies of states A and B respectively, and  $j$ s are the probability flux parameters that come from the fit.

The transition rates between the two states are simply the inverse of mean transition times. Thus following the above formalism, the transition rates between different states in the MCU model are given as follows.

$$R_{C_{00} \rightarrow C_{20}^{M1}} = \left[ \frac{1}{j_{00 \rightarrow 10} [Ca^{2+}]_C} + \frac{1}{j_{10 \rightarrow 20} [Ca^{2+}]_C^2} \right]^{-1}, \quad (S15A)$$

$$R_{C_{20}^{M1} \rightarrow C_{00}} = \frac{1}{K_{C_{20}^{M1}} [Ca^{2+}]_C^2} \left[ \frac{1}{j_{00 \rightarrow 10} [Ca^{2+}]_C} + \frac{1}{j_{10 \rightarrow 20} [Ca^{2+}]_C^2} \right]^{-1}, \quad (S15B)$$

$$R_{C_{00} \rightarrow C_{20}^{M2}} = \left[ \frac{1}{\tilde{j}_{00 \rightarrow 10} [Ca^{2+}]_C} + \frac{1}{\tilde{j}_{10 \rightarrow 20} [Ca^{2+}]_C^2} \right]^{-1}, \quad (S15C)$$

$$R_{C_{20}^{M2} \rightarrow C_{00}} = \frac{1}{K_{C_{20}^{M2}} [Ca^{2+}]_C^2} \left[ \frac{1}{\tilde{j}_{00 \rightarrow 10} [Ca^{2+}]_C} + \frac{1}{\tilde{j}_{10 \rightarrow 20} [Ca^{2+}]_C^2} \right]^{-1}, \quad (S15D)$$

$$R_{C_{20}^{M1} \rightarrow C_{30}} = \frac{1}{K_{C_{20}^{M1}} [Ca^{2+}]_C^2} \left[ \frac{1}{j_{20 \rightarrow 30} [Ca^{2+}]_C^3} \right]^{-1}, \quad (S15E)$$

$$R_{C_{30} \rightarrow C_{20}^{M1}} = \frac{1}{K_{C_{30}} [Ca^{2+}]_C^3} \left[ \frac{1}{j_{20 \rightarrow 30} [Ca^{2+}]_C^3} \right]^{-1}, \quad (S15F)$$

$$R_{C_{20}^{M2} \rightarrow O_{40}} = \frac{1}{K_{C_{20}^{M2}} [Ca^{2+}]_C^2} \left[ \frac{1}{\tilde{j}_{20 \rightarrow 30} [Ca^{2+}]_C^3} + \frac{1}{\tilde{j}_{30 \rightarrow 40} [Ca^{2+}]_C^4} \right]^{-1}, \quad (S15G)$$

$$R_{O_{40} \rightarrow C_{20}^{M1}} = \frac{1}{K_{O_{40}} [Ca^{2+}]_C^4} \left[ \frac{1}{\tilde{j}_{20 \rightarrow 30} [Ca^{2+}]_C^3} + \frac{1}{\tilde{j}_{30 \rightarrow 40} [Ca^{2+}]_C^4} \right]^{-1}, \quad (S15H)$$

$$R_{C_{30} \rightarrow O_{40}} = \frac{1}{K_{C_{30}} [Ca^{2+}]_C^3} \left[ \frac{1}{j_{30 \rightarrow 40} [Ca^{2+}]_C^4} \right]^{-1}, \quad (S15I)$$

$$R_{O_{40} \rightarrow C_{30}} = \frac{1}{K_{O_{40}} [Ca^{2+}]_C^4} \left[ \frac{1}{j_{30 \rightarrow 40} [Ca^{2+}]_C^4} \right]^{-1}, \quad (S15J)$$

$$R_{C_{30} \rightarrow C_{31}} = \frac{1}{K_{C_{30}} [Ca^{2+}]_C^3} \left[ \frac{1}{j_{30 \rightarrow 31} [Ca^{2+}]_C^3 [Ca^{2+}]_M} \right]^{-1}, \quad (S15K)$$

$$R_{C_{31} \rightarrow C_{30}} = \frac{1}{K_{C_{31}} [Ca^{2+}]_C^3 [Ca^{2+}]_M} \left[ \frac{1}{j_{30 \rightarrow 31} [Ca^{2+}]_C^3 [Ca^{2+}]_M} \right]^{-1}, \quad (S15L)$$

$$R_{C_{31} \rightarrow C_{41}} = \frac{1}{K_{C_{31}} [Ca^{2+}]_C^3 [Ca^{2+}]_M} \left[ \frac{1}{j_{31 \rightarrow 41} [Ca^{2+}]_C^4 [Ca^{2+}]_M} \right]^{-1}, \quad (S15M)$$

$$R_{C_{41} \rightarrow C_{31}} = \frac{1}{K_{C_{41}} [Ca^{2+}]_C^4 [Ca^{2+}]_M} \left[ \frac{1}{j_{31 \rightarrow 41} [Ca^{2+}]_C^4 [Ca^{2+}]_M} \right]^{-1}, \quad (S15N)$$

$$R_{C_{41} \rightarrow O_{40}} = \frac{1}{K_{C_{41}} [Ca^{2+}]_C^4 [Ca^{2+}]_M} \left[ \frac{1}{j_{40 \rightarrow 41} [Ca^{2+}]_C^4 [Ca^{2+}]_M} \right]^{-1}, \quad (S15O)$$

$$R_{O_{40} \rightarrow C_{41}} = \frac{1}{K_{O_{40}} [Ca^{2+}]_C^4} \left[ \frac{1}{j_{40 \rightarrow 41} [Ca^{2+}]_C^4 [Ca^{2+}]_M} \right]^{-1}, \quad (S15P)$$

$$R_{C_{41} \rightarrow O_{44}} = \frac{1}{K_{C_{41}} [Ca^{2+}]_C^4 [Ca^{2+}]_M} \left[ \frac{1}{j_{41 \rightarrow 42} [Ca^{2+}]_C^4 [Ca^{2+}]_M^2} + \frac{1}{j_{42 \rightarrow 43} [Ca^{2+}]_C^4 [Ca^{2+}]_M^3} + \frac{1}{j_{43 \rightarrow 44} [Ca^{2+}]_C^4 [Ca^{2+}]_M^4} \right]^{-1}, \quad (S15Q)$$

$$R_{O_{44} \rightarrow C_{41}} = \frac{1}{K_{O_{44}} [Ca^{2+}]_C^4 [Ca^{2+}]_M^4} \left[ \frac{1}{j_{41 \rightarrow 42} [Ca^{2+}]_C^4 [Ca^{2+}]_M^2} + \frac{1}{j_{42 \rightarrow 43} [Ca^{2+}]_C^4 [Ca^{2+}]_M^3} + \frac{1}{j_{43 \rightarrow 44} [Ca^{2+}]_C^4 [Ca^{2+}]_M^4} \right]^{-1}. \quad (S15R)$$

The model fit to the data is shown by the dashed line in (Figure 6A, main text). The values of various probability flux parameters given by the fit and their units are given in Table S3. Next, we used the transition rates listed above (Eqs. S15A-S15R) to stochastically simulate the gating of single MCU channel at different  $[Ca^{2+}]_C$  and  $[Ca^{2+}]_M$  values using the method previously developed [10-12] (Figure 6B, C main text).

## Supplementary References

- [1] B. Wacquier, L. Combettes, G.T.V. Nhieu, G. Dupont, Interplay Between Intracellular Ca<sup>2+</sup> Oscillations and Ca<sup>2+</sup>-stimulated Mitochondrial Metabolism, *Sci Rep-Uk*, 6 (2016).
- [2] G. Magnus, J. Keizer, Minimal model of beta-cell mitochondrial Ca<sup>2+</sup> handling, *Am J Physiol-Cell Ph*, 273 (1997) C717-C733.
- [3] G. Magnus, J. Keizer, Model of beta-cell mitochondrial calcium handling and electrical activity. II. Mitochondrial variables, *Am J Physiol-Cell Ph*, 274 (1998) C1174-C1184.
- [4] G. Magnus, J. Keizer, Model of beta-cell mitochondrial calcium handling and electrical activity. I. Cytoplasmic variables, *Am J Physiol-Cell Ph*, 274 (1998) C1158-C1173.
- [5] R. Bertram, M.G. Pedersen, D.S. Luciani, A. Sherman, A simplified model for mitochondrial ATP production, *J Theor Biol*, 243 (2006) 575-586.
- [6] G.T. Hanson, R. Aggeler, D. Oglesbee, M. Cannon, R.A. Capaldi, R.Y. Tsien, S.J. Remington, Investigating mitochondrial redox potential with redox-sensitive green fluorescent protein indicators, *J Biol Chem*, 279 (2004) 13044-13053.
- [7] M. Patron, V. Checchetto, A. Raffaello, E. Teardo, D.V. Reane, M. Mantoan, V. Granatiero, I. Szabò, D. De Stefani, R. Rizzuto, MICU1 and MICU2 finely tune the mitochondrial Ca<sup>2+</sup> uniporter by exerting opposite effects on MCU activity, *Molecular cell*, 53 (2014) 726-737.
- [8] G. Ullah, D.-O.D. Mak, J.E. Pearson, A data-driven model of a modal gated ion channel: The inositol 1, 4, 5-trisphosphate receptor in insect Sf9 cells, *The Journal of general physiology*, 140 (2012) 159-173.
- [9] G. Ullah, W.J. Bruno, J.E. Pearson, Simplification of reversible Markov chains by removal of states with low equilibrium occupancy, *Journal of theoretical biology*, 311 (2012) 117-129.
- [10] G. Ullah, P. Jung, Modeling the statistics of elementary calcium release events, *Biophysical journal*, 90 (2006) 3485-3495.
- [11] D.-O.D. Mak, K.-H. Cheung, P. Togliola, J.K. Foskett, G. Ullah, Analyzing and quantifying the gain-of-function enhancement of IP<sub>3</sub> receptor gating by familial Alzheimer's disease-causing mutants in Presenilins, *PLoS computational biology*, 11 (2015).
- [12] G. Ullah, I. Parker, D.-O.D. Mak, J.E. Pearson, Multi-scale data-driven modeling and observation of calcium puffs, *Cell calcium*, 52 (2012) 152-160.
- [13] M. Patron, V. Checchetto, A. Raffaello, E. Teardo, D. Vecellio Reane, M. Mantoan, V. Granatiero, I. Szabo, D. De Stefani, R. Rizzuto, MICU1 and MICU2 finely tune the mitochondrial Ca<sup>2+</sup> uniporter by exerting opposite effects on MCU activity, *Mol Cell*, 53 (2014) 726-737.

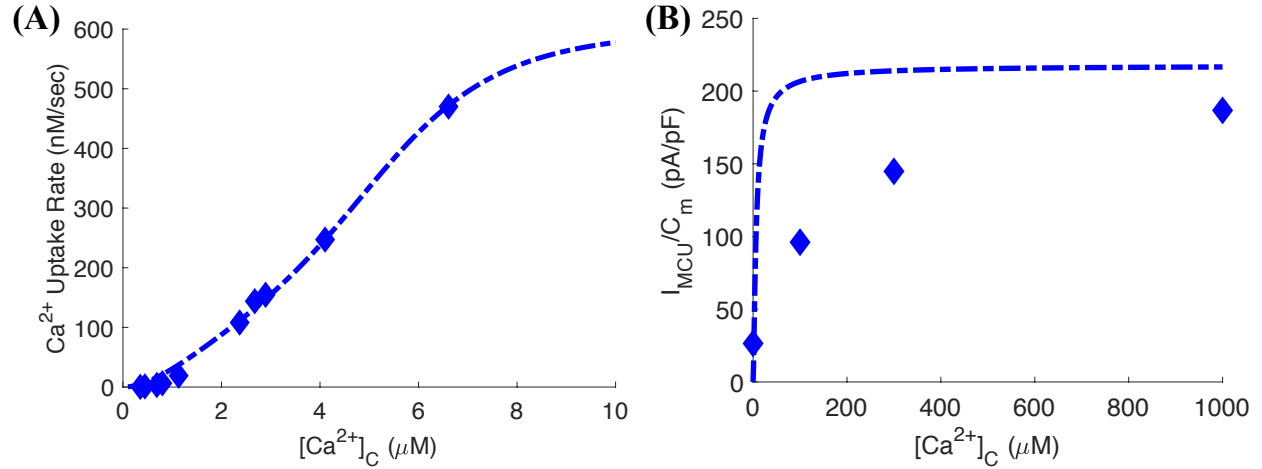

**Figure S1:** Using a different set of parameters improves the model fit to the MCU Ca<sup>2+</sup> uptake rate observed in MICU2 KO cell cultures (A) but deteriorates the fit to MCU current density as a function of [Ca<sup>2+</sup>]<sub>C</sub> at [Ca<sup>2+</sup>]<sub>M</sub> = 0.4 μM (B) in MICU2 KO mitoplasts. The occupancy parameters used are;  $K_{C_{20}^{M1}} = 9.45876 \times 10^3 / \mu\text{M}^2$ ,  $K_{C_{20}^{M2}} = 6.10726397 \times 10^4 / \mu\text{M}^2$ ,  $K_{C_{30}} = 4.028223 \times 10^2 / \mu\text{M}^3$ ,  $K_{O_{40}} = 1.10819 / \mu\text{M}^4$ ,  $K_{C_{31}} = 2.0408 \times 10^4 / \mu\text{M}^4$ ,  $K_{C_{41}} = 1.144274 \times 10^{-4} / \mu\text{M}^5$ ,  $K_{O_{44}} = 15.60478 / \mu\text{M}^8$ .

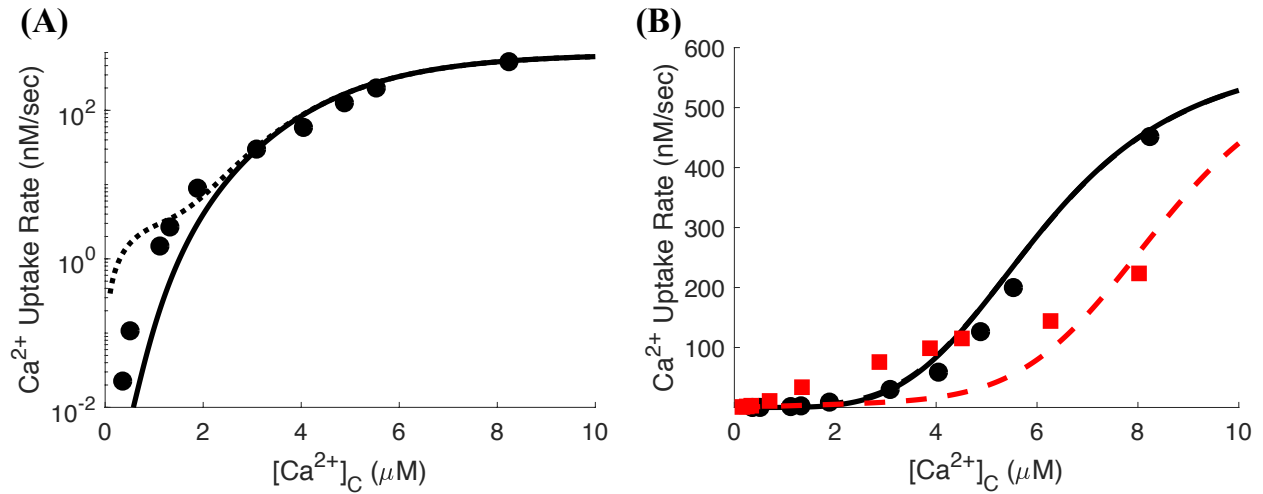

**Figure S2:** Considering the state with two and one  $Ca^{2+}$  bound to MICU1 and MICU2 respectively to be an open state results in higher  $Ca^{2+}$  uptake rate at low  $[Ca^{2+}]_C$  when compared to observed values in WT cell cultures (A) and significantly deteriorates the overall fit to the observed uptake rate in MICU1 KO cell cultures (B).

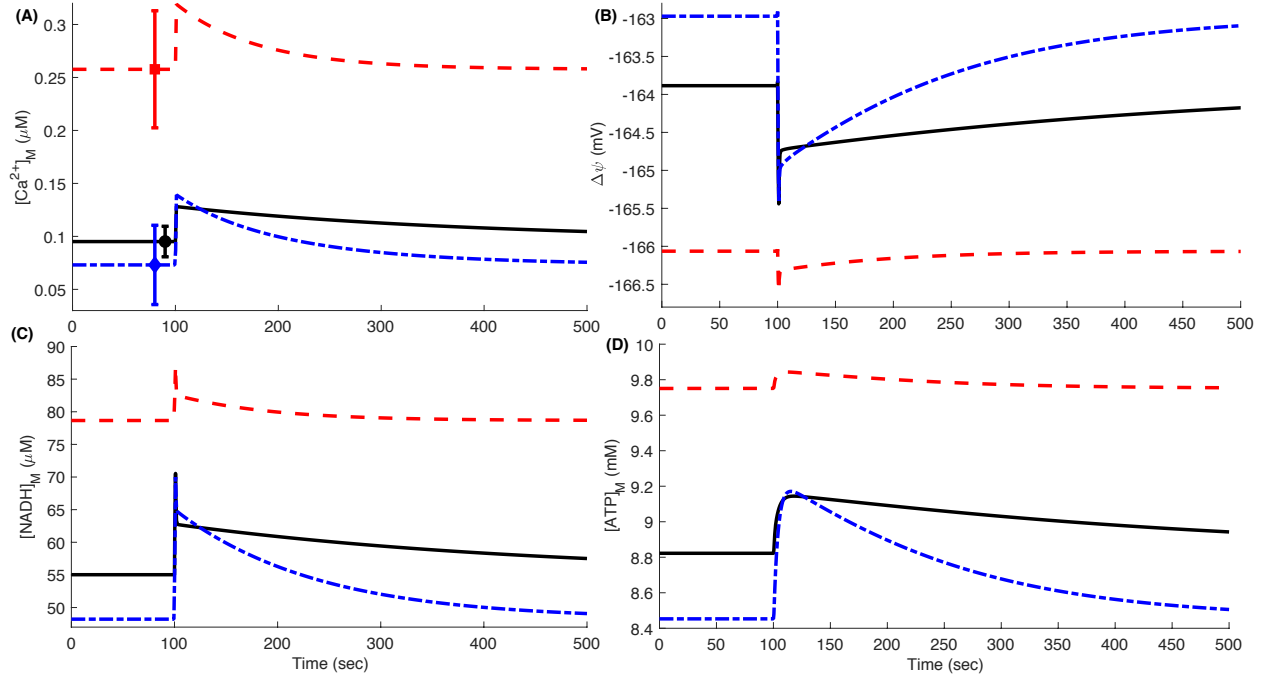

**Figure S3:** Changes in mitochondrial variables in response to a step-like increase in  $[Ca^{2+}]_C$  at the whole-cell level.  $[Ca^{2+}]_C$  is increased from its resting value of  $0.1\mu\text{M}$  to  $1.5\mu\text{M}$  for 1 sec starting at 100 sec into the simulation. Time trace of  $[Ca^{2+}]_M$  (A),  $\Delta\psi$  (B),  $[NADH]_M$  (C), and  $[ATP]_M$  (D). The solid, dashed, and dashed-dotted line corresponds to WT, MICU1 KO, and MICU2 KO cells respectively. The symbols in panel (A) represent the observed resting  $[Ca^{2+}]_M$  in WT (sphere), MICU1 KO (square), and MICU2 KO (diamond) cells and the error bars represent  $[Ca^{2+}]_M \pm \text{SEM}$  ( $n = 5$  for WT, MICU1 KO, and  $n = 8$  for MICU2 KO conditions). Parameters used in these simulations are the same as given in the text except that the mitochondrial  $Ca^{2+}$  buffering capacity  $f_m$  is set to 0.09.  $V_{NaCa,max}$  given by the model are 0.958, 2.144, and 3.03 nM/s for WT, MICU1 KO, and MICU2 KO cells respectively.



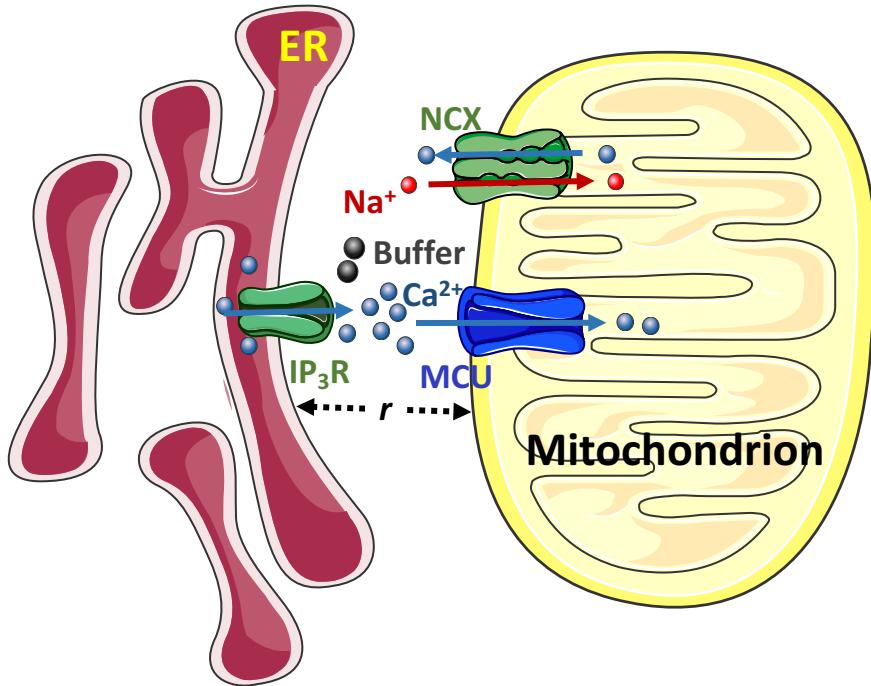

**Figure S4:** Schematic of the mitochondrial  $\text{Ca}^{2+}$  uptake model at the single mitochondrion level.  $\text{Ca}^{2+}$  released from the ER through  $\text{IP}_3\text{R}$  diffuses in the microdomain between the ER and mitochondrion, which is taken up by mitochondrion through MCU or buffered by  $\text{Ca}^{2+}$  binding proteins.  $\text{Ca}^{2+}$  is released back to the microdomain through  $\text{Na}^+/\text{Ca}^{2+}$  exchanger that extrudes one  $\text{Ca}^{2+}$  in exchange for three  $\text{Na}^+$ .

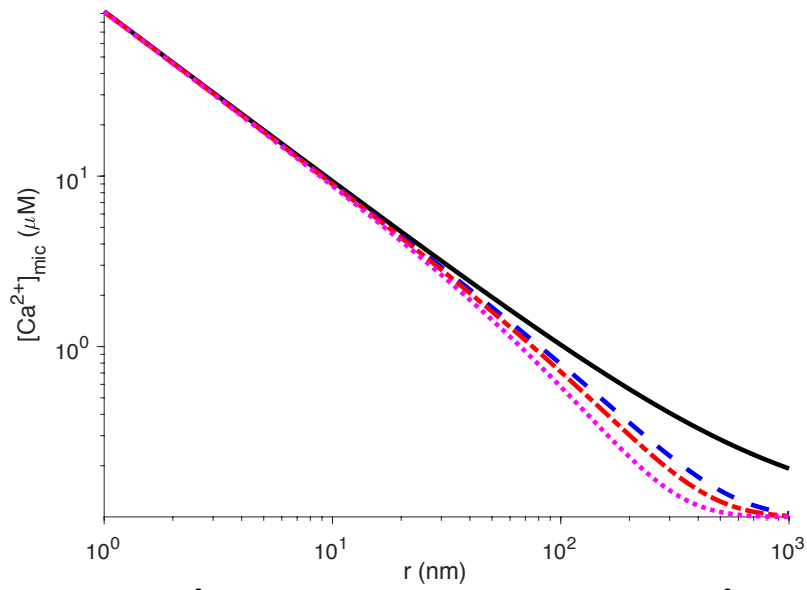

**Figure S5:**  $\text{Ca}^{2+}$  concentration in the microdomain ( $[\text{Ca}^{2+}]_{\text{mic}}$ ) due to the opening of a single  $\text{IP}_3\text{R}$  as a function of distance from the channel at  $B_T = 0$  (solid line), 100 (dashed line), 500 (dashed-dotted line), and 1000  $\mu\text{M}$  (dotted line).

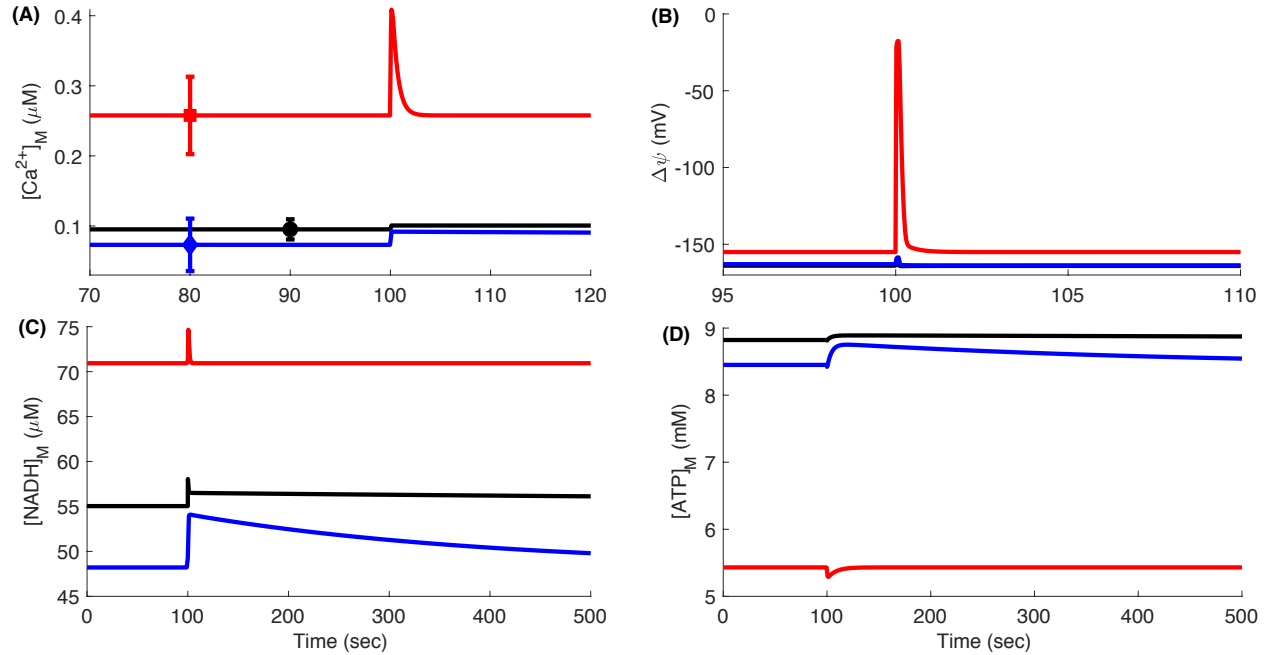

**Figure S6:** Changes in mitochondrial variables in response to the opening of a single IP<sub>3</sub>R channel at the single mitoplast level. A single IP<sub>3</sub>R residing in the ER membrane is allowed to open for 100 ms starting at 100 sec into the simulations. Time-traces of [Ca<sup>2+</sup>]<sub>M</sub> (A), Δψ (B), [NADH]<sub>M</sub> (C), and [ATP]<sub>M</sub> (D) in WT (black lines), MICU1 KO (red lines), and MICU2 KO (blue lines) cells respectively. The symbols in panel (A) represent the observed resting [Ca<sup>2+</sup>]<sub>M</sub> in WT (sphere), MICU1 KO (square), and MICU2 KO (diamond) cells and the error bars represent [Ca<sup>2+</sup>]<sub>M</sub> ± SEM (n = 5 for WT, MICU1 KO, and n = 8 for MICU2 KO conditions). Parameters used in simulations are the same as given in the text. The width of the microdomain in these simulations is 24 nm. The value of  $V_{NaCa,max}$  given by the model is 1.112, 1838.6, and 35.9675 μM/s in WT, MICU1 KO, and MICU2 KO cells respectively.

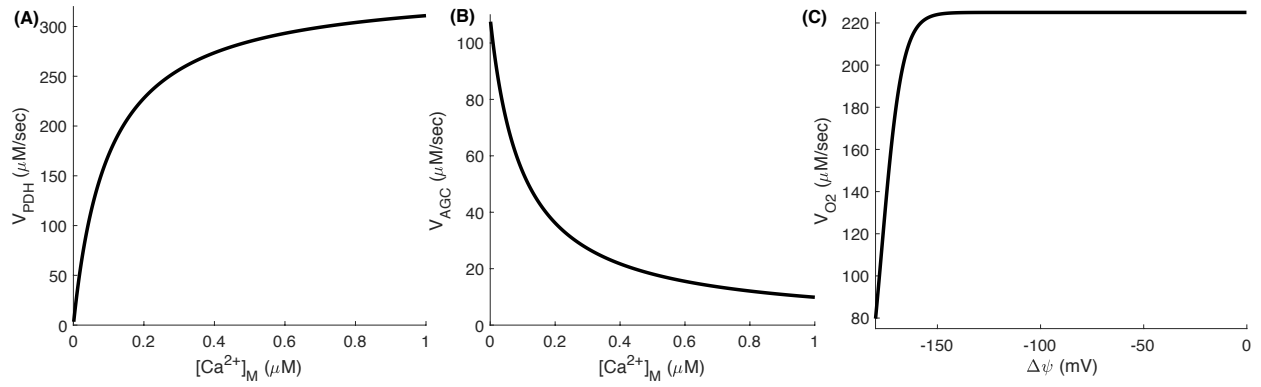

**Figure S7:** The behavior of the three reactions controlling  $[\text{NADH}]_M$ . Rates of pyruvate dehydrogenase-catalyzed reaction (A), malate-aspartate shuttle (B), and NADH oxidation/proton extrusion (C) as we change  $[\text{Ca}^{2+}]_M$  or  $\Delta\psi$  in the model.

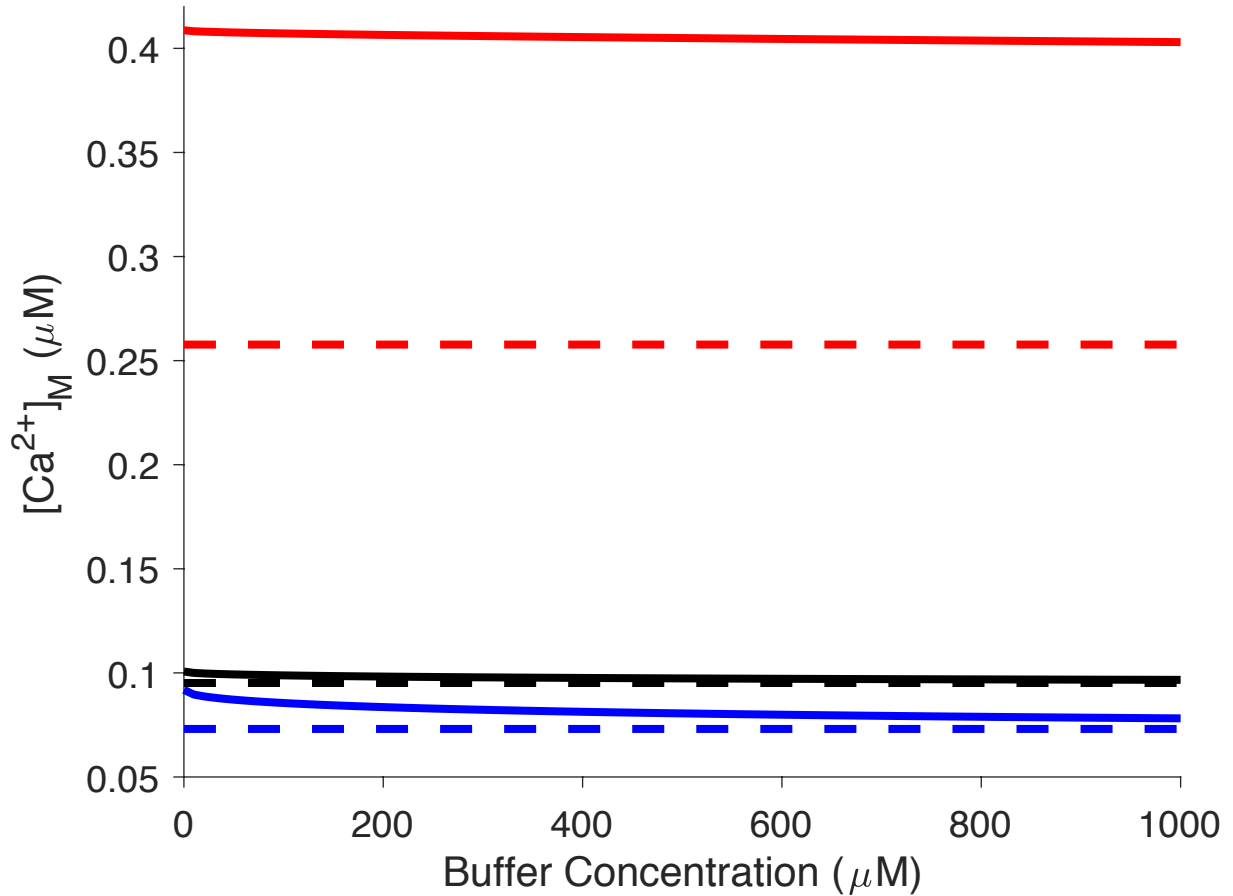

**Figure S8:** Changes in  $[Ca^{2+}]_M$  in response to the opening of a single  $IP_3R$  channel at the single mitochondrion level as we vary the concentration of  $Ca^{2+}$  buffer in the cytoplasm. A single  $IP_3R$  residing in the ER membrane is allowed to open for 100 ms starting at 100 sec into the simulations and the resting (dotted line) and maximum (solid line) values of  $[Ca^{2+}]_M$  are recorded in WT (black lines), MICU1 KO (red lines), and MICU2 KO (blue lines) cells. A 24 nm wide microdomain is considered in these simulations.

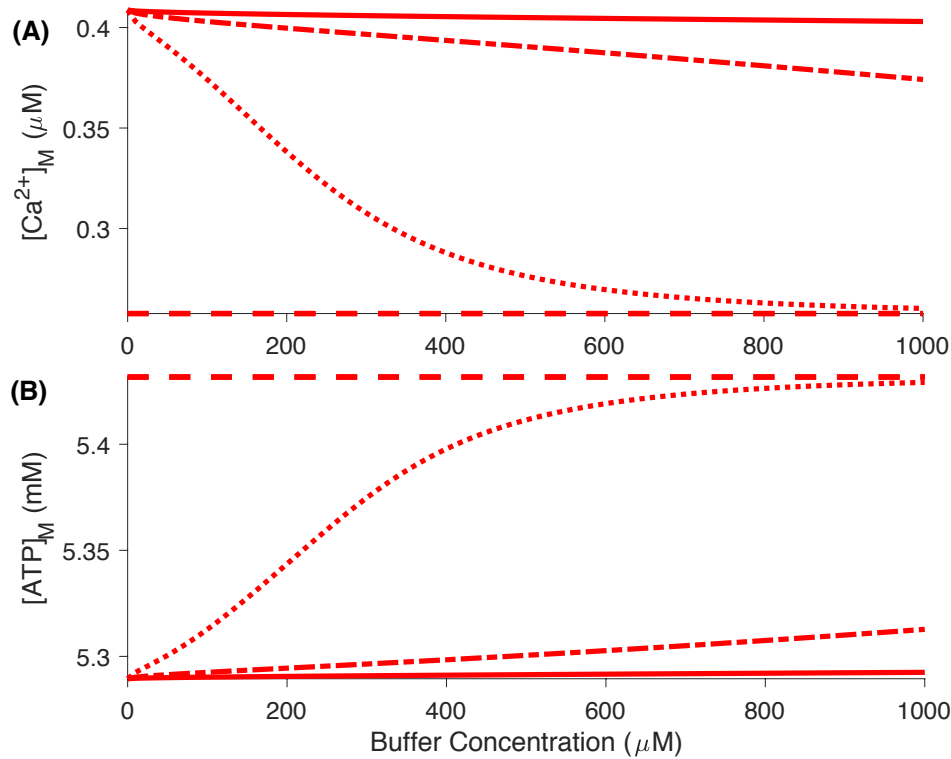

**Figure S9:** Changes in  $[\text{Ca}^{2+}]_{\text{M}}$  (A) and  $[\text{ATP}]_{\text{M}}$  (B) in response to the opening of a single  $\text{IP}_3\text{R}$  channel at the single mitochondrion level as we vary the concentration of  $\text{Ca}^{2+}$  buffer in the cytoplasm in MICU1 KO cells. A single  $\text{IP}_3\text{R}$  residing in the ER membrane is allowed to open for 100 ms starting at 100 sec into the simulations and the resting and maximum values of  $[\text{Ca}^{2+}]_{\text{M}}$  are recorded using buffers with different kinetics. The optimum value of  $[\text{Ca}^{2+}]_{\text{M}}$  (A) and  $[\text{ATP}]_{\text{M}}$  (B) after  $\text{IP}_3\text{R}$  opens (note that  $[\text{ATP}]_{\text{M}}$  decreases after  $\text{IP}_3\text{R}$  opens in case of MICU1 KO mitoplast) under control buffer (that described in the main text and used in Figure S8) (solid lines), a buffer with kinetics ten times faster than control (dashed-dotted lines), and a buffer with kinetics hundred times faster than control (dotted lines). The resting value of  $[\text{Ca}^{2+}]_{\text{M}}$  and  $[\text{ATP}]_{\text{M}}$  do not change as we change the kinetics of the buffer (dashed lines). A 24 nm wide microdomain is considered in these simulations.

| Parameter                     | Definition                                                                       | Value                                                |
|-------------------------------|----------------------------------------------------------------------------------|------------------------------------------------------|
| $a_1$                         | Scaling factor between NADH consumption and change in membrane voltage           | 20                                                   |
| $a_2$                         | Scaling factor between ATP production by ATPase and change in membrane voltage   | 3.43                                                 |
| $\alpha_C$                    | Factor taking cytosolic ADP and ATP buffering into account                       | 0.111                                                |
| $\alpha_M$                    | Factor taking mitochondrial ADP and ATP buffering into account                   | 0.139                                                |
| $A_C^{\text{tot}}$            | Total concentration of cytosolic adenine nucleotides                             | 2500 $\mu\text{M}$                                   |
| $A_M^{\text{tot}}$            | Total concentration of mitochondrial adenine nucleotides                         | 15000 $\mu\text{M}$                                  |
| $C_{\text{mito}}$             | Mitochondrial inner membrane capacitance divided by Faraday's constant           | 1.8 $\mu\text{M}\cdot\text{mV}^{-1}$                 |
| $\delta$                      | Mitochondrial to cytosolic volume ratio                                          | varies                                               |
| $f_m$                         | Fraction of free over buffer-bound $\text{Ca}^{2+}$ in mitochondria              | varies                                               |
| $K_{AGC}$                     | Dissociation constant of $\text{Ca}^{2+}$ from AGC                               | 0.14 $\mu\text{M}$                                   |
| $k_{GLY}$                     | Velocity of glycolysis (empirical)                                               | 450 $\mu\text{M}\cdot\text{s}^{-1}$                  |
| $K_h$                         | Michaelis-Menten constant for ATP hydrolysis                                     | 1000 $\mu\text{M}$                                   |
| $k_{HYD}$                     | Maximal rate of ATP hydrolysis                                                   | 100 $\mu\text{M}\cdot\text{s}^{-1}$                  |
| $k_o$                         | Rate constant of NADH oxidation by ETC                                           | 600 $\mu\text{M}\cdot\text{s}^{-1}$                  |
| $[\text{NAD}]_M^{\text{tot}}$ | Total concentration of mitochondrial pyridine nucleotides                        | 250 $\mu\text{M}$                                    |
| $p_4$                         | Voltage dependence coefficient of AGC activity                                   | 0.01 $\text{mV}^{-1}$                                |
| $q_1$                         | Michaelis-Menten-like constant for $\text{NAD}^+$ consumption by the Krebs cycle | 1                                                    |
| $q_2$                         | $S_{0.5}$ value for activation the Krebs cycle by $\text{Ca}^{2+}$               | 0.1 $\mu\text{M}$                                    |
|                               | $S_{0.5}$ value for indirect inhibition of the AGC by cytosolic $\text{Ca}^{2+}$ | 0.1 $\mu\text{M}$                                    |
| $q_3$                         | Michaelis-Menten constant for NADH consumption by the ETC                        | 100 $\mu\text{M}$                                    |
| $q_4$                         | Voltage dependence coefficient 1 of ETC activity                                 | 177 mV                                               |
| $q_5$                         | Voltage dependence coefficient 2 of ETC activity                                 | 5 mV                                                 |
| $q_6$                         | Inhibition constant of ATPase activity by ATP                                    | 10000 $\mu\text{M}$                                  |
| $q_7$                         | Voltage dependence coefficient of ATPase activity                                | 190 mV                                               |
| $q_8$                         | Voltage dependence coefficient of ATPase activity                                | 8.5 mV                                               |
| $q_9$                         | Voltage dependence of the proton leak                                            | 2 $\mu\text{M}\cdot\text{s}^{-1}\cdot\text{mV}^{-1}$ |
| $q_{10}$                      | Rate constant of the voltage-independent proton leak                             | -30 $\mu\text{M}\cdot\text{s}^{-1}$                  |
| $V_{ANT,max}$                 | Maximum rate of adenine nucleotide translocator                                  | 5000 $\mu\text{M}\cdot\text{s}^{-1}$                 |
| $V_{AGC,max}$                 | Maximum rate of NADH production via malate-aspartate shuttle                     | 25 $\mu\text{M}\cdot\text{s}^{-1}$                   |
| $V_{FIFO,max}$                | Maximum rate of FIFO ATPase                                                      | 35000 $\mu\text{M}\cdot\text{s}^{-1}$                |

**Table S1.** Meaning and values of various parameters used in the bioenergetics model.

| Parameter         | WT Cells                              | MICU1 KO Cells                        | MICU2 KO Cells                        |
|-------------------|---------------------------------------|---------------------------------------|---------------------------------------|
| $K_{C_{20}^{M1}}$ | $9.45876 \times 10^3 / \mu\text{M}^2$ | $4.23402 \times 10^3 / \mu\text{M}^2$ | $4.99195 \times 10^3 / \mu\text{M}^2$ |
| $K_{C_{20}^{M2}}$ | $6.10727 \times 10^4 / \mu\text{M}^2$ | $3.29724 \times 10^4 / \mu\text{M}^2$ | $4.98561 \times 10^4 / \mu\text{M}^2$ |
| $K_{C_{30}}$      | $0.17769 / \mu\text{M}^3$             | $2.47972 \times 10^5 / \mu\text{M}^3$ | $7.36347 \times 10^2 / \mu\text{M}^3$ |
| $K_{C_{31}}$      | $2.04082 \times 10^4 / \mu\text{M}^4$ | $0 / \mu\text{M}^4$                   | $0 / \mu\text{M}^4$                   |
| $K_{C_{41}}$      | $3.11575 / \mu\text{M}^5$             | $0 / \mu\text{M}^5$                   | $0 / \mu\text{M}^5$                   |
| $K_{O_{40}}$      | $2.14902 / \mu\text{M}^4$             | $1.37294 \times 10^4 / \mu\text{M}^4$ | $9.45846 / \mu\text{M}^4$             |
| $K_{O_{44}}$      | $15.70201 / \mu\text{M}^8$            | $0.95343 / \mu\text{M}^8$             | $21.44413 / \mu\text{M}^8$            |
|                   |                                       |                                       |                                       |

**Table S2:** Values of various parameters given by the fit of the kinetic model for MCU function to the observed open probability of MCU as a function of  $[\text{Ca}^{2+}]_C$  and  $[\text{Ca}^{2+}]_M$ .



| Parameter                       | Value                 | Unit                                 |
|---------------------------------|-----------------------|--------------------------------------|
| $j_{00 \rightarrow 10}$         | $4.98 \times 10^2$    | $[\text{msec. } \mu\text{M}]^{-1}$   |
| $j_{10 \rightarrow 20}$         | $4.98 \times 10^2$    | $[\text{msec. } \mu\text{M}^2]^{-1}$ |
| $\tilde{j}_{00 \rightarrow 10}$ | $4.98 \times 10^2$    | $[\text{msec. } \mu\text{M}]^{-1}$   |
| $\tilde{j}_{10 \rightarrow 20}$ | $4.98 \times 10^2$    | $[\text{msec. } \mu\text{M}^2]^{-1}$ |
| $j_{20 \rightarrow 30}$         | $4.98 \times 10^2$    | $[\text{msec. } \mu\text{M}^3]^{-1}$ |
| $\tilde{j}_{20 \rightarrow 30}$ | $11.0 \times 10^{-2}$ | $[\text{msec. } \mu\text{M}^3]^{-1}$ |
| $\tilde{j}_{30 \rightarrow 40}$ | $11.0 \times 10^{-2}$ | $[\text{msec. } \mu\text{M}^4]^{-1}$ |
| $j_{30 \rightarrow 40}$         | $2.0 \times 10^{-4}$  | $[\text{msec. } \mu\text{M}^4]^{-1}$ |
| $j_{30 \rightarrow 31}$         | $4.98 \times 10^2$    | $[\text{msec. } \mu\text{M}^4]^{-1}$ |
| $j_{31 \rightarrow 41}$         | $4.98 \times 10^2$    | $[\text{msec. } \mu\text{M}^5]^{-1}$ |
| $j_{40 \rightarrow 41}$         | $3.0 \times 10^{-4}$  | $[\text{msec. } \mu\text{M}^5]^{-1}$ |
| $j_{41 \rightarrow 42}$         | $52.0 \times 10^{-2}$ | $[\text{msec. } \mu\text{M}^6]^{-1}$ |
| $j_{42 \rightarrow 43}$         | $52.0 \times 10^{-2}$ | $[\text{msec. } \mu\text{M}^7]^{-1}$ |
| $j_{43 \rightarrow 44}$         | $52.0 \times 10^{-2}$ | $[\text{msec. } \mu\text{M}^8]^{-1}$ |

**Table S3:** Values of various probability flux parameters given by the fitting the model to open dwell-time distribution generated using the time constants ( $\tau_1 = 12.06$  ms and  $\tau_2 = 161.92$  ms) observed in lipid bilayer experiments [13].
